# Supplementary material for: The interpreter's brain during rest — Hyperconnectivity in the frontal lobe
Source: PubMed Central journal article supplement (PMC6107212; doi:10.1371/journal.pone.0202600), 2018-08-23
Supplement: pone.0202600.s004.pdf [file pone.0202600.s004.pdf]

**S1 Table: Autobiography of language characteristics.**

| Subject | Age | Learned languages (AoA; YoE; LS in s; LS in w)                                                                                                                             |
|---------|-----|----------------------------------------------------------------------------------------------------------------------------------------------------------------------------|
| SI 1    | 46  | <b>German</b> (0, 46, 5, 5), French (11, 35, 4, 4), English (12, 34, 5, 5), Latin (12, NA, NA, NA), Italian (15, NA, 2, 2), Spanish (20, NA, 1, 1)                         |
| SI 2    | 33  | <b>Italian</b> (0, 33, 5, 5), French (8, 25, 5, 5), German (13, 20, 3, 4), English (20, 13, 4, 5), Spanish (NA, NA, 1, 4), Portuguese (NA, NA, 1, 4)                       |
| SI 3    | 26  | <b>German</b> (0, 26, 5, 5), French (9, 17, 5, 5), English (11, 15, 5, 5), Spanish (14, 14, 5, 5)                                                                          |
| SI 4    | 23  | <b>German</b> (0, 23, 5, 5), French (9, 14, 5, 5), English (11, 12, 5, 5), Italian (14, 9, 4, 4), Japanese (14, 3, 1, 1), Chinese (19, 3, 1, 1)                            |
| SI 5    | 26  | <b>German</b> (0, 26, 5, 5), English (12, 14, 5, 5), French (12, 14, 3, 4), Spanish (14, 12, 4, 4), Portuguese (21, 5, 4, 4)                                               |
| SI 6    | 27  | <b>German</b> (0, 27, 5, 5), French (11, 16, 4, 3), English (13, 14, 5, 5), Italian (16, 1, 1, 1), Russian (18, 3, 1, 1), Czech (19, 8, 1, 1)                              |
| SI 7    | 26  | <b>German, English</b> (0, 26, 5, 5), French (11, 15, 3, 3), Spanish (16, 10, 4, 4), Italian (NA, NA, 1, 1)                                                                |
| SI 8    | 52  | <b>German</b> (0, 52, 5, 5), French (12, 40, 4, 4), Latin (12, 18, NA, NA), English (14, 38, 5, 5), Spanish (16, 36, 4, 4), Italian (27, 25, 4, 4)                         |
| SI 9    | 29  | <b>German</b> (0, 29, 5, 5), English (10, 19, 5, 5), French (11, 18, 4, 3), Spanish (15, 14, 4, 4), Croatian (24, 5, 4, 4), Italian (NA, NA, 1, 1)                         |
| SI 10   | 40  | <b>Macedonian</b> (0, 40, 5, 5), Serbian (6, 34, 5, 5), English (10, 30, 5, 5), Spanish (20, 20, 2, 2), Greek (22, 18, 2, 2), Swedish (24, 16, 2, 2), German (34, 6, 3, 3) |
| SI 11   | 43  | <b>German</b> (0, 43, 5, 5), French (13, 30, 5, 5), English (15, 28, 5, 5), Italian (15, 3, 3, 3), Swedish (18, 25, 5, 5), Russian (22, 5, 3, 2)                           |
| SI 12   | 32  | <b>German</b> (0, 32, 5, 5), English (7, 25, 5, 5), French (11, 21, 4, 4), Spanish (15, 17, 3, 3)                                                                          |
| SI 13   | 32  | <b>Italian</b> (0, 32, 5, 5), English (14, 18, 5, 5), French (14, 18, 5, 5), German (15, 17, 5, 5), Russian (27, 5, 4, 4), Arabic (31, 1, 1, 1)                            |
| SI 14   | 50  | <b>Italian</b> (0, 50, 5, 5), French (9, 41, 4, 4), English (12, 38, 5, 5), German (12, 38, 5, 5), Spanish (33, 17, 4, 4)                                                  |
| SI 15   | 42  | <b>German</b> (0, 42, 5, 5), English (10, 32, 4, 4), French (20, 22, 5, 5), Italian (21, 3, 3, 3), Thai (NA, NA, 2, 1)                                                     |
| SI 16   | 28  | <b>German</b> (0, 28, 5, 5), French (10, 18, 4, 4), English (12, 16, 5, 5), Spanish (15, 13, 4, 4)                                                                         |

|      |    |                                                                                                                                                                                                   |
|------|----|---------------------------------------------------------------------------------------------------------------------------------------------------------------------------------------------------|
| C 1  | 30 | <b>German</b> (0, 28, 5, 5), French (11, 19, 3, 3), English (15, 15, 4, 4), Spanish (17, 13, 4, 4), Italian (NA, NA, 1, 1), Arabic (NA, NA, 1, 1), Indonesian (NA, NA, 1, 1)                      |
| C 2  | 27 | <b>German</b> (0, 27, 5, 5), Serbian (12, 15, 4, 4), English (13, 14, 4, 4), French (13, 14, 1, 1), Italian (16, 11, 2, 2)                                                                        |
| C 3  | 46 | <b>German</b> (0, 46, 5, 5), English (12, 34, 4, 4), French (14, 32, 2, 2), Tibetan (40, 6, 2, 2)                                                                                                 |
| C 4  | 26 | <b>German, Greek</b> (0, 26, 5, 5), French (10, 6, 2, 1), English (13, 13, 4, 4)                                                                                                                  |
| C 5  | 40 | <b>Russian</b> (0, 40, 5, 5), German (11, 29, 5, 5), English (18, 22, 4, 4)                                                                                                                       |
| C 6  | 30 | <b>Luxembourgish</b> (0, 30, 5, 5), German (7, 23, 5, 5), French (7, 23, 5, 4), English (14, 16, 4, 3)                                                                                            |
| C 7  | 24 | <b>Armenian</b> (0, 24, 5, 5), Russian (12, 12, 3, 5), English (13, 11, 5, 5), Italian (19, 5, 3, 4), German (21, 3, 5, 5)                                                                        |
| C 8  | 29 | <b>Lithuanian</b> (0, 29, 5, 5), German (10, 7, 4, 4), Russian (12, 17, 2, 2), English (20, 8, 4, 4), French (23, 6, 1, 1)                                                                        |
| C 9  | 53 | <b>German</b> (0, 53, 5, 5), French (13, 6, 2, 2), English (14, 9, 2, 3), Japanese (52, 0.5, 1, 1)                                                                                                |
| C 10 | 25 | <b>English</b> (0, 25, 5, 5), German (11, 14, 5, 5), Polish (12, 13, 4, 2), French (12, 13, 4, 2), Spanish (12, 13, 4, 3), Portuguese (12, 13, 3, 1)                                              |
| C 11 | 30 | <b>German</b> (0, 30, 5, 5), French (11, 19, 4, 3), Italian (12, 18, 1, 2), English (13, 17, 5, 5), Spanish (15, 15, 5, 5)                                                                        |
| C 12 | 28 | <b>German</b> (0, 28, 5, 5), Dutch (3, 25, 5, 3), French (10, 18, 2, 2), English (12, 16, 4, 3), Spanish (20, 8, 5, 5), Latin (23, 5, 2, 5), ancient Greek (25, 3, 1, 5), Italian (28, 0.5, 2, 1) |
| C 13 | 34 | <b>German</b> (0, 34, 5, 5), French (8, 26, 5, 4), English (12, 22, 4, 4), Spanish (19, 15, 2, 1), Swedish (34, 0.5, 1, 1)                                                                        |
| C 14 | 36 | <b>Polish</b> (0, 36, 5, 5), German (11, 7, 5, 5), English (15, 20, 5, 5), Chinese (21, 15, 4, 4), Russian (31, 0.5, 2, 1)                                                                        |
| C 15 | 46 | <b>German</b> (0, 46, 5, 5), French (16, 30, 3, 3), Italian (17, 29, 3, 3), English (18, 28, 3, 3), Spanish (46, 0.5, 3, 1)                                                                       |
| C 16 | 45 | <b>German</b> (0, 45, 5, 5), French (11, 44, 4, 3), English (16, 29, 4, 3), Italian (NA, NA, 1, 1)                                                                                                |

---

The age of acquisition (AoA), the years of experience (YoE), and self-reported linguistic skills (LS) in speaking (s) and writing (w) are listed in parenthesis for every learned language. Mother tongue is printed in bold. SI = simultaneous interpreter, C = control subject.
