# Supplementary material for: The interpreter's brain during rest — Hyperconnectivity in the frontal lobe
Source: PubMed Central journal article supplement (PMC6107212; doi:10.1371/journal.pone.0202600), 2018-08-23
Supplement: pone.0202600.s005.pdf [file pone.0202600.s005.pdf]

**S2 Table: Directions of simultaneous interpreting of the SIs.**

| Subject | Interpreting directions |                      |                     |                     |
|---------|-------------------------|----------------------|---------------------|---------------------|
| SI 1    | German ↔ English        | French → German      |                     |                     |
| SI 2    | Italian ↔ English       | French → Italian     | German → Italian    |                     |
| SI 3    | German ↔ English        | French → German      | Spanish → German    |                     |
| SI 4    | German ↔ English        | French → German      | Italian → German    |                     |
| SI 5    | English → German        | French → German      | Spanish → German    | Portuguese → German |
| SI 6    | German ↔ English        | French → German      |                     |                     |
| SI 7    | German ↔ English        | French → German      | Spanish → German    |                     |
| SI 8    | English → German        | French → German      | Spanish → German    | Italian → German    |
| SI 9    | English → German        | French → German      | Spanish → German    | Croatian → German   |
| SI 10   | Macedonian ↔ English    | Macedonian ↔ Serbian | German → Macedonian |                     |
| SI 11   | German ↔ English        | French → German      | Swedish → German    |                     |
| SI 12   | German ↔ English        | French → German      | Spanish → German    |                     |
| SI 13   | German → Italian        | English → Italian    | French → Italian    |                     |
| SI 14   | German → Italian        | English → Italian    | French → Italian    | Spanish → Italian   |
| SI 15   | German ↔ French         | English → German     |                     |                     |
| SI 16   | German ↔ English        | French → German      |                     |                     |

The symbol '↔' means that SIs can translate into both languages, whereas '→' means that SIs can only work in one direction.
